# Supplementary material for: Confined migration promotes cancer metastasis through resistance to anoikis and increased invasiveness
Source: eLife journal article supplement (doi:10.7554/elife.73150), 2022-02-18
Supplement: data1 [file Fig1k source data ANNOTATED.pdf › 2022 Fanfone et al. source data WB panels/Fig1k source data ANNOTATED.pdf]

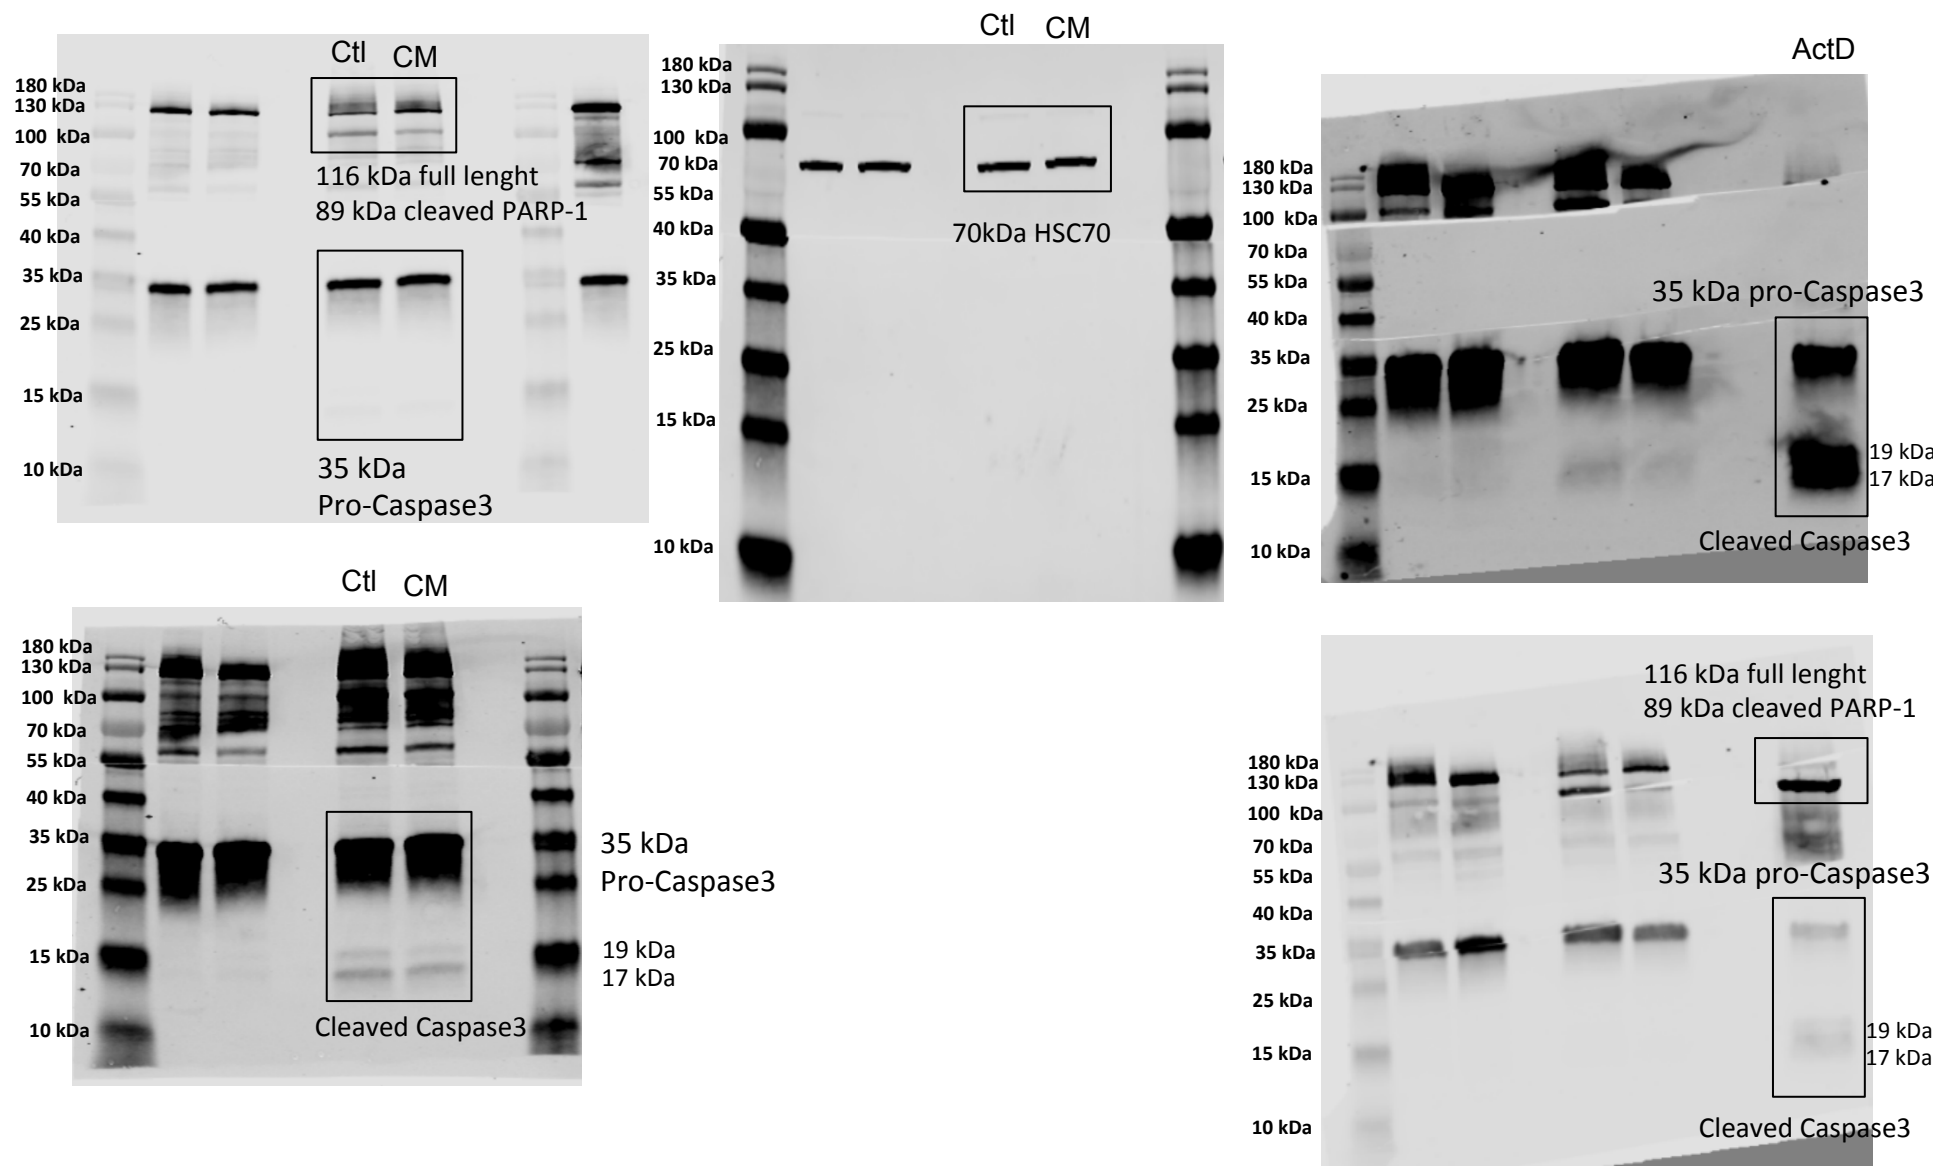

CRISPR<sup>Ctl</sup> MDA-MB-231

Figure 1K

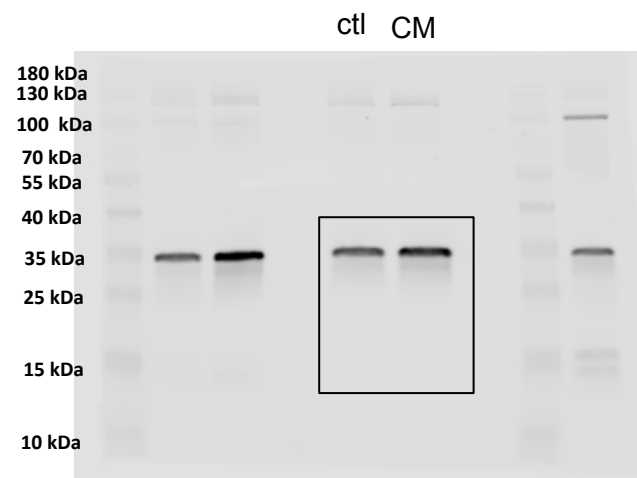

35 kDa  
pro-Caspase3

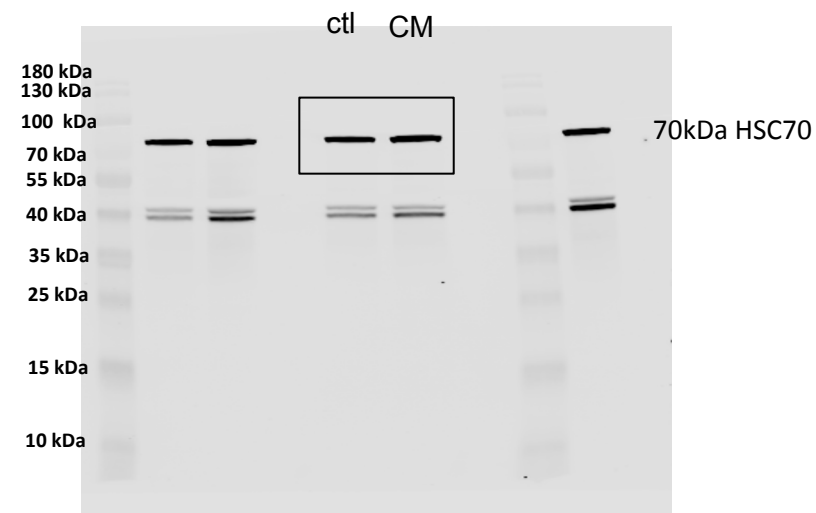

70kDa HSC70

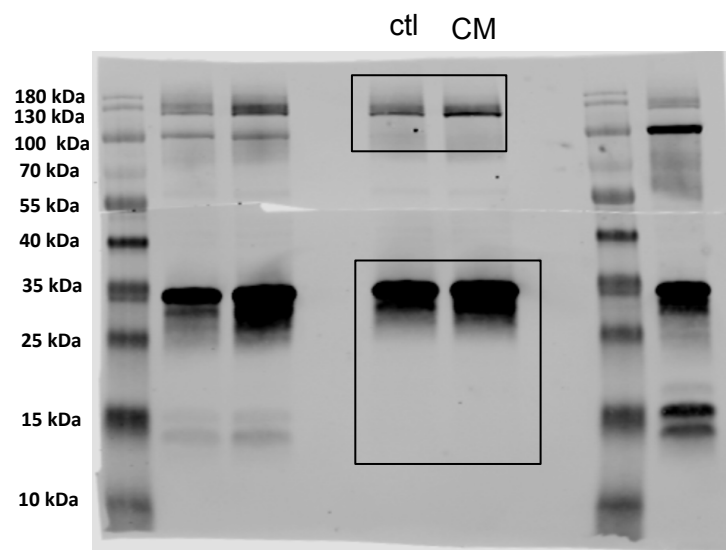

116 kDa full lenght  
89 kDa cleaved PARP-1

35 kDa  
pro-Caspase3

19 kDa  
17 kDa  
Cleaved Caspase3

Figure 1K

CRISPR <sup>BAX/BAK</sup> MDA-MB-231
