# Supplementary material for: Confined migration promotes cancer metastasis through resistance to anoikis and increased invasiveness
Source: eLife journal article supplement (doi:10.7554/elife.73150), 2022-02-18
Supplement: data1 [file Fig2H source data ANNOTATED.pdf › 2022 Fanfone et al. source data WB panels/Fig2H source data ANNOTATED.pdf]

BV6 - 1 0.5

180 kDa  
130 kDa  
100 kDa  
70 kDa  
55 kDa  
40 kDa  
35 kDa  
25 kDa  
15 kDa  
10 kDa

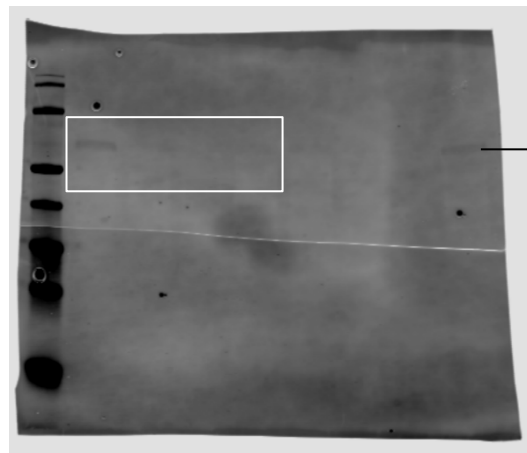

cIAP1 62 kDa

BV6 - 1 0.5

130 kDa  
100 kDa  
70 kDa  
55 kDa  
40 kDa  
35 kDa  
25 kDa  
15 kDa

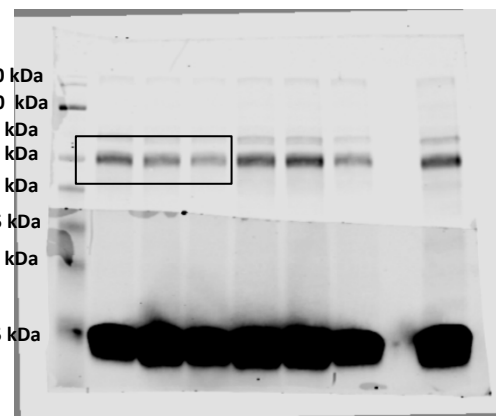

XIAP 53kDa

130 kDa  
100 kDa  
70 kDa  
55 kDa  
40 kDa  
35 kDa  
25 kDa  
15 kDa

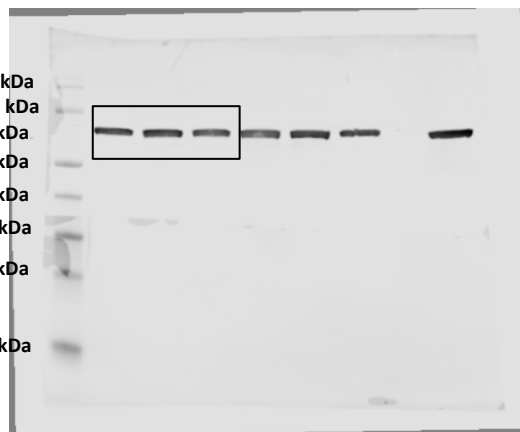

HSC70 70kDa

130 kDa  
100 kDa  
70 kDa  
55 kDa  
40 kDa  
35 kDa  
25 kDa  
15 kDa  
10 kDa

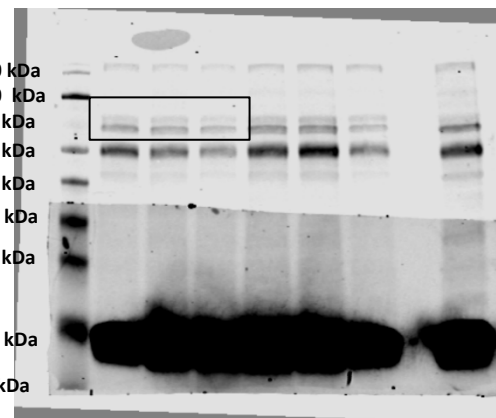

cIAP2 70kda

Figure 2H
