# Supplementary material for: Confined migration promotes cancer metastasis through resistance to anoikis and increased invasiveness
Source: eLife journal article supplement (doi:10.7554/elife.73150), 2022-02-18
Supplement: data2 [file Figure 1 D.xlsx]

## Sheet: Sheet1
	Ctl			CM			Actinomycin D
Casp +ve cells (%)	1.61	1.6	1.66	1.29	1.15	1.14	26.36	28.47	21.17
