# Supplementary material for: Confined migration promotes cancer metastasis through resistance to anoikis and increased invasiveness
Source: eLife journal article supplement (doi:10.7554/elife.73150), 2022-02-18
Supplement: data2 [file Figure 1 E.xlsx]

## Sheet: Sheet1
Time (h)	Ctl		CM
	Mean	SEM	Mean	SEM
0	29.5721	2.6659	30.1662	4.76686
1	29.2876	2.77898	31.659	4.82797
2	31.3349	3.23241	33.3972	5.07445
3	33.1102	3.20531	34.7455	5.37154
4	33.2589	3.60395	35.794	5.22841
5	36.2536	2.22214	38.685	3.84593
6	37.3888	2.22838	39.9752	3.99693
7	38.214	2.3349	40.6101	3.98129
8	39.6565	2.49885	41.4314	4.24642
9	41.3901	2.5553	42.6331	3.98805
10	43.1501	2.70319	43.9364	4.5088
11	44.4272	2.5759	45.2242	4.5962
12	45.7045	2.66877	46.2632	4.75948
13	47.5852	2.72435	48.0243	5.28735
14	49.2031	2.94311	49.3242	4.88159
15	50.0683	2.77106	50.296	5.05626
16	51.9484	3.06428	51.6232	5.3358
17	52.5771	3.25961	52.0308	5.18087
18	53.5209	3.00938	53.6536	5.6944
19	53.9876	2.87556	54.3289	5.39173
20	56.6095	3.0085	56.572	5.17263
21	57.0856	2.80473	57.1597	5.12903
22	58.6023	3.05151	59.0143	5.66054
23	59.5763	3.02654	59.6809	5.47725
24	62.073	3.3568	60.8115	5.24718
25	62.2257	3.38448	62.1925	5.29417
26	63.7486	3.28061	64.4055	5.71978
27	64.65	3.25743	64.8898	5.66669
28	67.0502	3.26963	66.9428	5.303
29	67.7655	3.18052	67.5346	5.49992
30	69.4476	3.01225	69.1445	5.80168
31	73.9002	2.8479	73.1799	4.73777
32	73.5106	3.26599	74.2867	4.80214
33	74.4834	2.94636	74.9931	4.81326
34	75.2509	2.49837	75.774	4.48181
35	76.0735	2.91042	76.9465	4.52559
36	77.1574	3.02678	77.8943	4.37496
37	77.863	2.85125	78.6442	4.3256
38	79.0805	2.82864	78.8742	4.40068
39	79.2906	2.86644	80.32	4.01521
40	80.2226	2.85714	80.6068	4.15524
41	80.4819	2.53959	81.5871	3.93283
42	81.0439	2.34747	81.9521	3.84721
43	81.3224	2.22014	82.32	3.61871
44	82.319	2.08513	82.8652	3.67805
45	82.2389	2.23343	83.4244	3.5152
46	82.8447	2.0757	83.4078	3.40937
47	82.7766	1.8761	83.8342	3.11909
48	82.9556	1.94906	83.9783	3.038
