# Supplementary material for: Confined migration promotes cancer metastasis through resistance to anoikis and increased invasiveness
Source: eLife journal article supplement (doi:10.7554/elife.73150), 2022-02-18
Supplement: data2 [file Figure 1 F.xlsx]

## Sheet: Sheet1
	Ctl			CM
Day 7	131	191	216	341	359	294
Day 14	165	145	123	258	304	238
