# Supplementary material for: Confined migration promotes cancer metastasis through resistance to anoikis and increased invasiveness
Source: eLife journal article supplement (doi:10.7554/elife.73150), 2022-02-18
Supplement: data2 [file Figure 1 figure supplement 1 D.xlsx]

## Sheet: Sheet1
Ctl	CM	ActD
4.32	2.96	14.81
4.49	3.27	15.12
3.82	3.49	16.98
