# Supplementary material for: Confined migration promotes cancer metastasis through resistance to anoikis and increased invasiveness
Source: eLife journal article supplement (doi:10.7554/elife.73150), 2022-02-18
Supplement: data2 [file Figure 1 figure supplement 1 E.xlsx]

## Sheet: Sheet1
	Ctl			CM
G1	69.5367	73.2133	72.07	63.36	61.8833	61.6367
S	7.92333	10.4733	12.42	11.5867	13.78	15.4733
G2/M	21.88	10.97	11.22	23.6933	19.7433	19.4467
