# Supplementary material for: Confined migration promotes cancer metastasis through resistance to anoikis and increased invasiveness
Source: eLife journal article supplement (doi:10.7554/elife.73150), 2022-02-18
Supplement: data2 [file Figure 1 figure supplement 1 F.xlsx]

## Sheet: Sheet1
Ctl	CM	CCCP
351.4	368.4	178.2
356.3	367.9	321.6
352.9	374.2	348.8
