# Supplementary material for: Confined migration promotes cancer metastasis through resistance to anoikis and increased invasiveness
Source: eLife journal article supplement (doi:10.7554/elife.73150), 2022-02-18
Supplement: data2 [file Figure 1 figure supplement 1 G.xlsx]

## Sheet: Sheet1
Ctl	CM	H2O2
5.21164	4.96123	0.113348
5.29771	4.94169	0.11416
5.27272	4.95637	0.110465
