# Supplementary material for: Confined migration promotes cancer metastasis through resistance to anoikis and increased invasiveness
Source: eLife journal article supplement (doi:10.7554/elife.73150), 2022-02-18
Supplement: data2 [file Figure 1 figure supplement 1 H.xlsx]

## Sheet: Sheet1
Ctl	CM	H2O2
90.8	48.1	183.2
74.9	46.5	200
85.2	48.7	196.9
