# Supplementary material for: Confined migration promotes cancer metastasis through resistance to anoikis and increased invasiveness
Source: eLife journal article supplement (doi:10.7554/elife.73150), 2022-02-18
Supplement: data2 [file Figure 1 figure supplement 1 J.xlsx]

## Sheet: Sheet1
	Ctl			CM
Day 7	70	64	35.5	103	103	75.5
Day 14	19.5	10.5	12.5	28	23.5	18.5
