# Supplementary material for: Confined migration promotes cancer metastasis through resistance to anoikis and increased invasiveness
Source: eLife journal article supplement (doi:10.7554/elife.73150), 2022-02-18
Supplement: data2 [file Figure 1 figure supplement 1 L.xlsx]

## Sheet: Sheet1
Control	600 Pa
177.5	272.28
180.69	252.47
146.95	185.7
77.58	177.65
47.16	303.35
215.73	106.75
260.6	406.42
158.85	244.71
232.37	281.09
169.26	450.52
373.74	375.25
191.51	788.89
141.65	348
102.39	354.46
163.95	434.57
94.71	347.32
81.01	448.47
190.13	347.32
128.98	393.66
102.39	390.03
151.79	330.67
163.3	252.75
194.19	217.07
327.61	254.92
192.45	334.34
203.46	431.26
140.14	426.68
321.04	243.55
172.26	364.4
241.83	277.49
95.07	431.9
71.11	247.77
227.58	254.08
161.21	370.14
129.32	197.28
134.91	535.48
194.86	304.49
173.34	439.66
71.11	400.76
145.1	236.92
91.92	358.1
218.69	386.02
150.71	324.53
231.86	302.27
178.94	351.42
138.17	241.5
214.63	286.5
203.6	380.66
271.52	209.13
131.02	203.84
183.51	285.5
322.8	300.09
189.47	253.35
245.04	191.88
171.2	353.4
73.76	506.81
83.17	306.63
164.7	233.55
115.79	539.75
150.3	345.15
174.48	402.55
126.54	337.57
140.84	339.62
198.49	450.27
187.7	240.7
140.7	232.53
128.82	482.16
265.35	368.49
219.81	220.1
157.07	389.59
192.99	260.8
264.64	378.46
109.3	428.8
163.35	239.5
180	295.32
171.04	282.3
284.07	354.66
242.2	323.19
135.71	265
222.43	360.81
154.24	258.41
192.11	216.86
156.33	317.08
156.52	353.65
187.14	370.21
99.6	253.21
98.25	389.31
174.95	370.81
108.9	356.42
182.22	223.25
145.96	135.43
130.22	141.61
195.37	297.4
190.64	262.13
173.38	303.6
247.52	165.05
278.31	359.8
220.97	313.44
171.24	182.5
301.58	258.11
123.96	244.3
125.05	215.05
177.94	136.75
177.5	222.48
109.01	388.86
275.67	263.71
137.82	240.93
248.16	346.81
196.66	340.86
130.69	279
211.96	373.52
135.69	257.72
235.2	231.05
238.18	200.46
280.12	203.83
44.71	238.28
56.65	233.51
43.96	354.49
244.49	215.55
96.83	331.44
122.5	472.19
206.46	229.52
108.41	238.41
155.19	473.95
197.88	215.55
156.64	214.27
139.28	270.17
282.61	247.84
103.49	295.33
274.89	400.51
105.53	222.77
124.4	289.23
124.31	343.54
112.53	286.28
90.8	250
166.53	234.66
179.9	260.58
81.85	361.13
123.78	441.78
207.92	420.27
84.07	377.14
171.38	396.65
50.38	308.43
130.34	486.75
123.56	339.94
122.67	357.36
176.77	499.11
163.18	477.27
179.87	268.78
232.36	307.97
