# Supplementary material for: Confined migration promotes cancer metastasis through resistance to anoikis and increased invasiveness
Source: eLife journal article supplement (doi:10.7554/elife.73150), 2022-02-18
Supplement: data2 [file Figure 1 figure supplement 1 M.xlsx]

## Sheet: Sheet1
	Control			8 μm transwell
Day 7	180.5	158.5	231	197.5	165	182
Day 14	240	235.5	288.5	401	272	366.5
