# Supplementary material for: Confined migration promotes cancer metastasis through resistance to anoikis and increased invasiveness
Source: eLife journal article supplement (doi:10.7554/elife.73150), 2022-02-18
Supplement: data2 [file Figure 1 figure supplement 1 O.xlsx]

## Sheet: Sheet1
	Control			8 μm transwell
post migration	249	233	235	229	292	281
Anoikis	379	266	361	275	248	400
