# Supplementary material for: Confined migration promotes cancer metastasis through resistance to anoikis and increased invasiveness
Source: eLife journal article supplement (doi:10.7554/elife.73150), 2022-02-18
Supplement: data2 [file Figure 1 G.xlsx]

## Sheet: Sheet1
Ctl	CM
6.5	34.5
20	42.5
16.5	37
