# Supplementary material for: Confined migration promotes cancer metastasis through resistance to anoikis and increased invasiveness
Source: eLife journal article supplement (doi:10.7554/elife.73150), 2022-02-18
Supplement: data2 [file Figure 1 I.xlsx]

## Sheet: Sheet1
	Ctl		CM
Time (h)	Mean	SEM	Mean	SEM
1	379.25	15.8438	141.375	13.6577
2	1153.75	54.0568	616.5	34.2204
3	1550.5	71.8866	780	42.2725
4	1801.75	83.9872	897.375	44.9928
5	1878.62	60.3576	974.25	70.1851
6	1940.62	34.5145	956.75	39.0452
7	2070.88	28.1542	1028.38	34.324
8	2147.25	35.9477	1095.88	30.077
9	2292.5	25.8153	1168.25	24.4195
10	2414.12	20.0779	1248.75	29.2549
11	2539.25	19.3194	1304.62	26.0877
12	2638.12	10.2477	1408.38	25.2332
13	2736.25	18.3758	1465.12	22.0789
14	2826.38	21.1702	1515.12	21.398
15	2908	14.3003	1587.38	18.6929
16	2956.38	16.2634	1672.38	23.1439
17	2947.75	17.0501	1747.62	17.243
18	3018.62	26.2352	1800.12	17.6822
19	3031.25	25.322	1847	15.9194
20	3056.25	22.658	1896.88	15.8952
21	3082.5	32.7163	1937.38	17.1516
22	3092	24.3171	1976.62	18.9284
23	3102.5	26.9782	2002.5	18.735
24	3099.25	28.0966	2039.25	24.7449
25	3094.75	39.0168	2056.5	18.1836
26	3098	28.7775	2110.25	25.255
27	3107.75	36.0113	2122.62	20.4799
28	3098.88	28.9781	2153	12.6815
29	3056.12	30.2858	2182.12	12.439
30	3093.88	31.3764	2189.5	22.247
31	3056.25	29.5029	2212.25	22.3661
32	3060.62	28.8438	2237.62	20.8797
33	3044.88	34.9461	2242	24.9936
34	3035.38	35.9603	2273.88	23.4082
35	3028	38.1117	2305.38	19.8206
36	3015.5	33.0476	2319.38	24.2553
37	3017.38	31.2644	2356.62	20.8257
38	3032.5	36.2437	2369.75	25.6618
39	3033.5	40.949	2415.62	24.497
40	3053.25	40.979	2435.75	16.3933
41	3033.25	42.5776	2443.12	28.8688
42	3023	41.6388	2487.88	28.1339
43	3046.38	48.3421	2485.5	35.3538
44	3055.75	54.1555	2515.62	32.0691
45	3040.62	57.559	2565.5	24.8431
46	3044.75	68.8144	2588.12	30.9097
47	3056.25	72.1419	2587.75	32.6577
48	3085	75.861	2602.12	37.1067
