# Supplementary material for: Confined migration promotes cancer metastasis through resistance to anoikis and increased invasiveness
Source: eLife journal article supplement (doi:10.7554/elife.73150), 2022-02-18
Supplement: data2 [file Figure 1 J.xlsx]

## Sheet: Sheet1
Ctl	CM d0	CM d3	CM d5	CM d7
1	1.62852	1.22438	1.08485	0.900825
1	1.42043	1.3084	0.977688	1.18704
1	1.74661	1.39464	0.906543	0.975281
