# Supplementary material for: Confined migration promotes cancer metastasis through resistance to anoikis and increased invasiveness
Source: eLife journal article supplement (doi:10.7554/elife.73150), 2022-02-18
Supplement: data2 [file Figure 1 L.xlsx]

## Sheet: Sheet1
cl Casp3		PARP-1
Ctl	CM	Ctl	CM
1	0.556407	1	0.979221
1	0.737371	1	0.0725727
1	0.84	1	0.4402
		1	0.406356
		1	0.575738
