# Supplementary material for: Confined migration promotes cancer metastasis through resistance to anoikis and increased invasiveness
Source: eLife journal article supplement (doi:10.7554/elife.73150), 2022-02-18
Supplement: data2 [file Figure 1 M.xlsx]

## Sheet: Sheet1
	Ctl			CM			ActD
After CM	7453	8873	7370	7191	6671	7702	19656	15602	20536
Anoikis	39855	45199	40701	19595	23449	20462
