# Supplementary material for: Confined migration promotes cancer metastasis through resistance to anoikis and increased invasiveness
Source: eLife journal article supplement (doi:10.7554/elife.73150), 2022-02-18
Supplement: data2 [file Figure 1 N.xlsx]

## Sheet: Sheet1
	Contr			200 Pa			400 Pa			600 Pa
day 7	170	167.5	165.5	163	150.5	148.5	134.5	140.5	144	151	157	150
day 14	523	485.5	532	565.5	543	538.5	554.5	528.5	515.5	537	528	551.5
