# Supplementary material for: Confined migration promotes cancer metastasis through resistance to anoikis and increased invasiveness
Source: eLife journal article supplement (doi:10.7554/elife.73150), 2022-02-18
Supplement: data2 [file Figure 1 O.xlsx]

## Sheet: Sheet1
Contr			200 Pa			400 Pa			600 Pa
247.5	206.5	129	125.5	122.5	89.5	121.5	109	104	111	120.5	115.5
