# Supplementary material for: Confined migration promotes cancer metastasis through resistance to anoikis and increased invasiveness
Source: eLife journal article supplement (doi:10.7554/elife.73150), 2022-02-18
Supplement: data2 [file Figure 2 A.xlsx]

## Sheet: Sheet1
	Ctl				CM
cIAP1	1	1	1		1.21666	1.32748	1.34546
cIAP2	1	1	1	1	1.27843	1.53873	1.06291	1.13664
XIAP	1	1	1	1	1.3705	1.42973	1.11426	1.05376
