# Supplementary material for: Confined migration promotes cancer metastasis through resistance to anoikis and increased invasiveness
Source: eLife journal article supplement (doi:10.7554/elife.73150), 2022-02-18
Supplement: data2 [file Figure 2 D.xlsx]

## Sheet: Sheet1
	Control			cIAP2
Day 7	268	204	211.5	218.5	184.5	187
Day 14	329	329	338	387.5	326.5	334.5
