# Supplementary material for: Confined migration promotes cancer metastasis through resistance to anoikis and increased invasiveness
Source: eLife journal article supplement (doi:10.7554/elife.73150), 2022-02-18
Supplement: data2 [file Figure 2 E.xlsx]

## Sheet: Sheet1
	Control			XIAP
day 7	246	254.5	256	508	453	425.5
day 14	638.5	564.5	502	735.5	850	701
