# Supplementary material for: Confined migration promotes cancer metastasis through resistance to anoikis and increased invasiveness
Source: eLife journal article supplement (doi:10.7554/elife.73150), 2022-02-18
Supplement: data2 [file Figure 2 figure supplement 1 A.xlsx]

## Sheet: Sheet1
	Ctl				200 Pa				400 Pa				600 Pa
cIAP1	1	1	1	1	1.2	0.88	0.46	1.17	0.93	0.98	0.66	1.59	1.04	0.49	0.56	2.64
cIAP2	1	1	1		1.3	0.98	0.92		1.43	1.06	0.82		1.07	0.9	1.16
XIAP	1	1	1	1	1.15	1.08	0.25	1.27	0.98	1.3	0.48	1.31	0.91	1.13	0.3	2.08
