# Supplementary material for: Confined migration promotes cancer metastasis through resistance to anoikis and increased invasiveness
Source: eLife journal article supplement (doi:10.7554/elife.73150), 2022-02-18
Supplement: data2 [file Figure 2 figure supplement 1 C.xlsx]

## Sheet: Sheet1
ev/CTL			ev/CONSTR			cIAP1/CTL			cIAP1/CONSTR			cIAP2/CTL			cIAP2/CONSTR			XIAP/CTL			XIAP/CONSTR
1	1	1	1.86929	3.48297	2.69214	1	1	1	1.06428	1.19664	1.05224	1	1	1	0.943912	0.508892	0.980848	1	1	1	0.867188	0.998437	0.998437
