# Supplementary material for: Confined migration promotes cancer metastasis through resistance to anoikis and increased invasiveness
Source: eLife journal article supplement (doi:10.7554/elife.73150), 2022-02-18
Supplement: data2 [file Figure 2 figure supplement 1 D.xlsx]

## Sheet: Sheet1
	Ctl			CM
BIRC2	1	1	1	0.90594	1.03412	0.964702
BIRC3	1	1	1	0.688324	0.752675	0.742723
XIAP	1	1	1	0.855804	0.810455	0.632949
