# Supplementary material for: Confined migration promotes cancer metastasis through resistance to anoikis and increased invasiveness
Source: eLife journal article supplement (doi:10.7554/elife.73150), 2022-02-18
Supplement: data2 [file Figure 2 figure supplement 1 E.xlsx]

## Sheet: Sheet1
Ctl	CM
1	1.224
1	1.07
1	1.14
1	1.05
