# Supplementary material for: Confined migration promotes cancer metastasis through resistance to anoikis and increased invasiveness
Source: eLife journal article supplement (doi:10.7554/elife.73150), 2022-02-18
Supplement: data2 [file Figure 2 figure supplement 1 G.xlsx]

## Sheet: Sheet1
	Control	CM	+TNFalpha
Cell with cytosolic p65	221	135	12
Cells with nuclear p65	53	167	193
