# Supplementary material for: Confined migration promotes cancer metastasis through resistance to anoikis and increased invasiveness
Source: eLife journal article supplement (doi:10.7554/elife.73150), 2022-02-18
Supplement: data2 [file Figure 2 figure supplement 1 H.xlsx]

## Sheet: Sheet1
	Ctl				TNFα
NFκB Rep1	0.00242754	0.00245117	0.00215888	0.00249769	0.00574013	0.00582658	0.00758124	0.0079724
NFκB Rep2	0.0147067	0.0143579	0.0164887	0.0163368	0.0342845	0.0352077	0.0299749	0.0317578
