# Supplementary material for: Confined migration promotes cancer metastasis through resistance to anoikis and increased invasiveness
Source: eLife journal article supplement (doi:10.7554/elife.73150), 2022-02-18
Supplement: data2 [file Figure 2 figure supplement 1 I.xlsx]

## Sheet: Sheet1
	Control				CM
NFκB Rep1	0.00406637	0.00401355	0.00399056	0.00439536	0.00723522	0.0152933	0.00714286	0.0169445
NFκB Rep2	0.0207731	0.0186476	0.0214496	0.0188986	0.0321813	0.0308845	0.0396126	0.0306577
