# Supplementary material for: Confined migration promotes cancer metastasis through resistance to anoikis and increased invasiveness
Source: eLife journal article supplement (doi:10.7554/elife.73150), 2022-02-18
Supplement: data2 [file Figure 2 figure supplement 1 J.xlsx]

## Sheet: Sheet1
	EV	EV/+TNFα	IKBSR	IKBSR/+TNFα
Cytosolic p65	275	68	337	341
Nuclear p65	37	298	11	51
