# Supplementary material for: Confined migration promotes cancer metastasis through resistance to anoikis and increased invasiveness
Source: eLife journal article supplement (doi:10.7554/elife.73150), 2022-02-18
Supplement: data2 [file Figure 2 figure supplement 1 K.xlsx]

## Sheet: Sheet1
Time (h)	EV Ctl		EV CM		IkBSR Ctl		IkBSR CM
	Mean	SEM	Mean	SEM	Mean	SEM	Mean	SEM
0	542.5	38.1107	565.5	58.7084	711.875	36.4086	685.75	47.5412
2	1241	69.0352	1043	64.8688	1217.38	119.391	848.125	56.912
4	1578.5	117.622	873.375	90.9971	1709.5	137.831	890.75	75.9865
6	1542.88	61.9379	847.5	47.3071	1595.5	192.691	925.875	99.2348
8	1682.75	30.8457	906.125	80.3229	1529.25	43.0945	965.25	133.208
10	1786.12	94.7281	1030	95.9848	1655.25	89.0228	1045.88	140.429
12	1927.38	93.5464	1175.25	121.54	1819.38	53.2514	1147.12	146.794
14	2042.12	87.4229	1347.62	118.957	1834.38	91.6225	1243.62	162.1
16	2122.38	79.234	1481.12	121.019	1926.62	86.3113	1353.25	169.605
18	2162.38	85.022	1626.12	120.147	1999.25	76.6886	1445.25	182.203
20	2221.5	85.4852	1708	125.982	2041.38	75.7418	1560.12	155.756
22	2229.38	87.6454	1799.62	127.511	2095.38	63.4021	1631.38	160.146
24	2269.25	94.6993	1864.88	123.747	2137.5	65.5144	1683.88	159.648
26	2284.25	90.8959	1963.5	120.419	2169.12	67.7288	1765.88	163.521
28	2319	77.3794	1992.62	126.672	2176.38	68.1851	1816.25	161.796
30	2348.88	88.1669	2037.25	131.35	2226.88	75.4552	1854.38	178.026
32	2394	97.9289	2103.5	125.522	2241.75	63.2633	1873.75	179.424
34	2424.25	83.6561	2123.25	119.6	2231.12	55.068	1978	192.208
36	2427.12	91.4194	2173.25	122.78	2275.12	59.3276	1996.38	192.28
38	2433.12	101.352	2206	132.036	2273.25	74.3337	2042.25	188.089
40	2459.12	104.311	2229.75	126.732	2357.25	32.5696	2151.62	196.677
42	2501.25	103.619	2276.62	108.408	2306.88	64.4727	2215	189.314
44	2537.12	99.3142	2331.62	119.996	2309.5	66.7803	2266.25	186.769
46	2543.62	92.7081	2354.12	125.618	2329.25	58.6995	2337.5	193.794
48	2538.88	113.214	2383.38	121.987	2342.5	49.4495	2446.38	184.497
