# Supplementary material for: Confined migration promotes cancer metastasis through resistance to anoikis and increased invasiveness
Source: eLife journal article supplement (doi:10.7554/elife.73150), 2022-02-18
Supplement: data2 [file Figure 2 figure supplement 1 L.xlsx]

## Sheet: Sheet1
	EV Ctl			EV CM			IkBSR Ctl			IkBSR CM
Day 7	248	270	241.5	434.5	438	354	335.5	351.5	260	755	616.5	575.5
Day 14	492.5	577	452	890	1026.5	958.5	667	711	567.5	1071.5	990.5	1086
