# Supplementary material for: Confined migration promotes cancer metastasis through resistance to anoikis and increased invasiveness
Source: eLife journal article supplement (doi:10.7554/elife.73150), 2022-02-18
Supplement: data2 [file Figure 2 figure supplement 1 M.xlsx]

## Sheet: Sheet1
Ctl	TNFα 6h	TNFα 24h
1	1.14106	1.49279
1	1.13948	1.46281
1	1.21434	1.47227
