# Supplementary material for: Confined migration promotes cancer metastasis through resistance to anoikis and increased invasiveness
Source: eLife journal article supplement (doi:10.7554/elife.73150), 2022-02-18
Supplement: data2 [file Figure 2 G.xlsx]

## Sheet: Sheet1
	ev/CTL			ev/CONSTR			cIAP1/CTL			cIAP1/CONSTR			cIAP2/CTL			cIAP2/CONSTR			XIAP/CTL			XIAP/CONSTR
day 7	1	1	1	1.30071	1.64571	1.63071	1	1	1	1.10435	1.01739	0.96087	1	1	1	0.857143	0.956044	1.22684	1	1	1	0.860082	1.15226	1.02469
day 14	1	1	1	1.45395	1.21489	1.72044	1	1	1	1.28284	1.20329	1.15666	1	1	1	1.21257	0.918242	1.19724	1	1	1	1.2885	0.876623	1.09369
