# Supplementary material for: Confined migration promotes cancer metastasis through resistance to anoikis and increased invasiveness
Source: eLife journal article supplement (doi:10.7554/elife.73150), 2022-02-18
Supplement: data2 [file Figure 2 J.xlsx]

## Sheet: Sheet1
	Control			CM
NT	50	80	75	107	98.5	106.5
BV6	50	42	45	53	45	51.5
