# Supplementary material for: Confined migration promotes cancer metastasis through resistance to anoikis and increased invasiveness
Source: eLife journal article supplement (doi:10.7554/elife.73150), 2022-02-18
Supplement: data2 [file Figure 2 L.xlsx]

## Sheet: Sheet1
CTL	cIAP1	CTL	XIAP
43.0948	56.9052	52.5929	47.4071
46.2905	53.7095	44.4558	55.5442
48.9024	51.0976	50.7475	49.2525
