# Supplementary material for: Confined migration promotes cancer metastasis through resistance to anoikis and increased invasiveness
Source: eLife journal article supplement (doi:10.7554/elife.73150), 2022-02-18
Supplement: data2 [file Figure 2 N.xlsx]

## Sheet: Sheet1
CTL	Anoikis resistant
50.4435	49.5565
55.0824	44.9176
50.5814	49.4186
