# Supplementary material for: Confined migration promotes cancer metastasis through resistance to anoikis and increased invasiveness
Source: eLife journal article supplement (doi:10.7554/elife.73150), 2022-02-18
Supplement: data2 [file Figure 3 A.xlsx]

## Sheet: Sheet1
stress fibres		Filopodia
Ctl	CM	Ctl	CM
0	0	4	31
0	15	0	17
1	23	13	23
0	9	3	6
0	32	13	11
0	35	0	13
0	17	0	11
0	9	0	10
0	16	1	15
0	0	0	5
2	0	2	6
0	0	2	11
4	0	5	3
0	0	9	12
0	9	4	12
3	6	0	2
0	10	7	5
0	19	2	0
0	5	8	15
0	5	10	11
0	0	0	8
0	0	0	11
4	17	7	2
3	14	2	16
20	9	3	13
7	8	9	3
3	3	4	9
8	19	8	6
0	11	4	7
0	10	0	14
2	16	11	7
0	8	12	0
2	16	5	1
5	23	10	13
0	11	3	5
0	16	5	15
0	21	0	6
0	6	10	25
0	10	8	0
0	0	7	2
0	15	7	0
0	28	10	0
0	25	0	3
0	11	2	5
0	10	1	9
0	18	0	1
0	12	0	13
1	19	2	16
9	7	19	15
3	0	9	29
3	1	0	2
10	0	8	3
2	10	0	13
11	0	0	15
2	15	4	18
0	6	3	11
7	11	3	0
7	2	6	0
9	0	0	1
0	9	14	17
11	14	6	20
7	4	17	22
30	8	7	10
0	6	0	18
3	12	0	7
2	36	1	6
20	0	0	1
21	4	0	1
12	5	12	12
2	0	7	3
0	0	0	20
0	0	0	4
0	0	0	12
8	0	2	0
7	3	0	0
6	14	14	15
14	2	0	1
4	1	4	13
11	6	8	13
2	4	12	7
8	6	0	6
0	22	0	8
18	29	0	23
16	18	13	22
11	12	0	11
9	8	7	5
29	30	6	15
9	15	0	5
0	4	0	12
14	6	0	11
0	55	0	12
0	14	0	11
0	5	0	23
0	6	5	15
0	5	0	9
0	9	3	10
0	11	0	6
0	29	5	5
0	5	3	6
0	15	0	5
0	7	0	5
0	0	0	19
4	14	0	13
20	8	0	9
20	18	11
10	3	5
6	3	0
0	6	19
0	2	10
0	0	6
0	8	0
0	9	2
0	15
0	17
0	17
5	16
0	10
0	5
7	0
10	17
3	2
9	9
11	17
15	29
0	13
0	16
0	14
0	32
0	13
0	6
0	5
0	8
15	9
6	12
6	0
9	8
9	41
8	24
7	14
5	6
9	13
2	5
0	8
10	12
2	13
0	11
0	15
0	24
13	18
8	33
28	7
15	30
14	28
0	50
12	24
7	8
	17
	8
	0
