# Supplementary material for: Confined migration promotes cancer metastasis through resistance to anoikis and increased invasiveness
Source: eLife journal article supplement (doi:10.7554/elife.73150), 2022-02-18
Supplement: data2 [file Figure 3 B.xlsx]

## Sheet: Sheet1
Time (min)	Ctl									CM
0	0	0	0	0	0	0	0	0	0	0	0	0	0	0	0	0	0	0	0
5	0.00609889	-0.0306256	-0.221363	0.0207294	0.00353197	0.0625164	-0.0324081	-0.0285429	0.0941998	0.0783386	-0.0929628	-0.0105218	0.0775592	0.00854474	0.0220067	0.101045	-0.108835	0.219468	0.0848183
10	-0.0122524	0.0492573	0.0133671	-0.0762483	-0.00449711	-0.0487658	-0.0232701	0.0683097	0.122721	0.0206003	-0.115611	0.0893644	0.114544	0.10267	-0.0835109	0.0482489	0.0325448	-0.0673175	-0.0115312
15	-0.0808956	-0.0324796	-0.00994484	-0.0346893	0.0135735	0.033813	0.0655038	0.0513239	-0.00746612	0.0622311	-0.216432	0.0648372	-0.0119807	0.241201	0.0118938	0.0272809	-0.145806	0.0999151	-0.0448829
20	-0.00215576	-0.0320447	-0.189636	0.0688378	0.127397	0.0314085	0.0595686	0.189509	0.00689033	-0.13058	0.261844	-0.183243	-0.108311	-0.408111	0.314263	0.0740643	0.199577	0.0890492	0.0526098
25	-0.0373301	0.0437181	0.241776	-0.0413187	-0.0272085	-0.0644701	0.00644181	0.0355038	0.0699589	0.175796	0.166628	0.152424	0.0763951	0.0626024	0.0664653	0.103863	0.0803634	-0.0544709	-0.219329
30	-0.0160045	-0.00157935	-0.148045	0.0669951	0.0440675	0.0276515	-0.051263	-0.0725729	0.0466201	-0.0793423	-0.16189	-0.0351912	-0.0435331	0.0429893	0.00950867	0.0595972	-0.0151171	-0.141002	-0.140148
35	0.00117339	0.0585044	-8.0525e-05	0.0360912	0.00870672	7.51399e-05	0.0924834	-0.0446961	-0.0751795	-0.287592	-0.159637	-0.0335916	-0.0284723	0.136184	-0.325807	-0.335901	0.240816	-0.0969723	-0.175944
40	0.0167822	-0.0377669	0.0359947	-0.0085922	0.03226	0.314536	-0.0607991	-0.267677	-0.0240298	-0.154192	0.337358	0.116664	-0.0108893	-0.125161	0.00925425	-0.0676762	-0.475444	0.136927	0.138965
45	-0.0862304	-0.0252009	0.157789	0.0195077	-0.134379	-0.227374	-0.0856616	0.129692	0.0291543	0.231861	-0.242547	-0.0511873	0.0111561	-0.074202	0.221848	-0.0276191	0.273283	0.0463498	0.0151384
50	0.0806227	0.0356383	-0.011193	0.0194676	0.0664914	-0.0083781	0.0490735	0.0993505	0.0140686	0.0055444	0.0986827	-0.0141476	-0.0188441	0.0242175	-0.0465893	-0.0195401	0.197071	-0.0727221	0.0863755
55	-0.0105878	0.0232095	0.0328542	-0.0208095	0.00778266	-0.0087538	0.00517516	-0.152839	0.037273	0.0501864	0.0354749	0.0436514	0.0613829	-0.0134591	-0.0952139	-0.199872	-0.362693	-0.11313	-0.0739376
60	0.0183649	-0.0206002	0.140476	0.0179054	-0.124091	0.0634557	0.109909	0.244463	0.116022	-0.264889	-0.112953	0.176916	0.0241069	-0.071457	0.187057	0.0982639	0.161314	0.000990379	-0.0601396
