# Supplementary material for: Confined migration promotes cancer metastasis through resistance to anoikis and increased invasiveness
Source: eLife journal article supplement (doi:10.7554/elife.73150), 2022-02-18
Supplement: data2 [file Figure 3 E.xlsx]

## Sheet: Sheet1
Ctl	CM
132.49	223.37
272.1	366.75
224.14	334.42
220.86	204.88
211.12	183.78
234	238.72
363.63	298.72
171.43	211.49
158.5	353.33
434.54	322.56
254.89	254.65
200.35	140.77
250.41	317.33
282.5	178.29
285.64	239.21
317.35	228.38
279.82	288.21
303.6	506.31
110.33	237.3
189.01	438.96
334.81	342.18
251.81	461.33
282.94	275.32
411.9	174.18
157.37	429.28
307.67	242.19
205.19	297.42
169.82	202.54
345.93	531.57
329.81	332.97
257.32	269.58
76.92	277.77
148.22	434.33
132.01	208.51
165.96	386.31
302.01	391.24
361.48	331.45
314.75	239.31
181.03	322.58
252.85	189.51
338.43	526.95
248.86	261.07
361.29	278.17
442.12	497.86
300.7	366.44
280.88	187.59
285.69	344.59
183.08	130.44
114.69	314.51
198.79	283.8
265.47	214.7
369.17	596.21
257.34	346.06
187.16	379.69
214.8	190.79
328.27	261.07
338.21	150.03
374.47	304.31
192.67	314.22
225.14	388.14
363.87	316.77
232.1	496.17
383.82	294.97
338.71	440.9
231.2	373.82
360.48	424.9
328.09	296.61
401.57	366.88
289.46	168.95
354.3	342.16
357.15	307.37
258.06	265.49
146.96	234.08
129.71	321.8
368.01	227.43
339.98	284.36
84	301.02
210.68	412.54
149.28	405.97
226.13	513.11
286.39	321.44
396.98	211.18
287.27	332.61
105.66	390.3
113.29	363.38
133.59	250.45
408.79	411.48
182.86	545.52
212.63	254.66
240.34	433.41
250.86	370.95
288.21	237.4
332.59	305.47
267.5	324.51
181.75	308.42
240.6	333.04
397.56	390.2
136.62	348.06
474.54	472.81
79.43	378.59
296.97	366.07
510.09	225.38
205.6	389.12
400.98	155.05
384.66	433.7
261.55	388.48
192.27	500.88
328.11	394.64
69.01	527.08
45.36	278.78
233.19
354.5
346.4
414.8
335.72
201.65
139.46
