# Supplementary material for: Confined migration promotes cancer metastasis through resistance to anoikis and increased invasiveness
Source: eLife journal article supplement (doi:10.7554/elife.73150), 2022-02-18
Supplement: data2 [file Figure 3 figure supplement 1 C.xlsx]

## Sheet: Sheet1
	Ctl			CM
H3K27Ac	1	1	1	0.39	0.48	0.53
H3K9me3	1	1	1	0.61	0.58	0.49
