# Supplementary material for: Confined migration promotes cancer metastasis through resistance to anoikis and increased invasiveness
Source: eLife journal article supplement (doi:10.7554/elife.73150), 2022-02-18
Supplement: data2 [file Figure 3 figure supplement 1 F.xlsx]

## Sheet: Sheet1
Ctl -Pax	CM - Pax	Ctl - Vin	CM - Vin
0.091416	0.108776	0.12336	0.0469571
0.0456914	0.0902501	0.0510103	0.0633235
0.0962946	0.0770604	0.0690298	0.030125
0.0459177	0.0826426	0.134537	0.0733663
0.149209	0.0740129	0.240773	0.0363427
0.204146	0.0937155	0.206225	0.0275186
0.0555444	0.0991286	0.0512559	0.0236048
0.0973419	0.0400179	0.0616137	0.03604
0.0330224	0.217274	0.0869038	0.107646
0.105553	0.0719094	0.0508557	0.0778641
0.0428147	0.0950804	0.0738319	0.0810295
0.0390277	0.120935	0.0434449	0.0976824
0.052107	0.0498745	0.0810093	0.0673458
0.0906531	0.0544214	0.0799743	0.0261471
0.121872	0.0722336	0.0172995	0.0444855
0.0794117	0.0641823	0.0380602	0.0414946
0.0642803	0.0676195	0.0558194	0.0842758
0.0814505	0.0384541	0.0553978	0.0592742
0.098324	0.0496679	0.0773537	0.0371836
0.052349	0.0331047	0.122453	0.0331305
0.044111	0.0474182	0.0620628	0.0411368
0.0618548	0.0342273	0.0666031	0.0471776
0.0577351	0.0427696	0.0339499	0.0615202
0.0990838	0.0359477	0.0453366	0.0449764
0.0807174	0.0675582	0.101543	0.0450612
0.0490298	0.0966497	0.0788206	0.0338522
0.0535804	0.0540588	0.0233071	0.027167
0.0394866	0.0332022	0.0520198	0.0313261
0.0373167	0.0601725	0.056744	0.0370565
0.0768958	0.108626	0.0902773	0.0432123
0.0682488	0.0838842	0.0437712	0.0827103
0.122905	0.0998789	0.0327442	0.0561088
0.0957416	0.100294	0.0325134	0.093699
0.0714204	0.0531411	0.0858996	0.0587459
0.101836	0.060357	0.0831785	0.0295581
0.14199	0.149854	0.0915415	0.0396566
0.0353697	0.0892456	0.0872241	0.0449108
0.0651911	0.0877511	0.0697534	0.0343634
0.169071	0.0490245	0.0378886	0.0677234
0.103305	0.0690005	0.0615989	0.0331317
0.0369607	0.0620966	0.0682723	0.0436248
0.084705	0.0634872	0.0843086	0.0369422
0.093671	0.110276	0.0491093	0.0501977
0.0553157	0.0968598	0.0410734	0.0612247
0.0741746	0.0334298	0.0559846	0.0446514
0.0872901	0.10678	0.0397711	0.111758
0.0882525	0.0516988	0.0416057	0.0274102
0.0686215	0.135374	0.0342201	0.0459798
0.0801177	0.0718914	0.0721481	0.0425325
0.121101	0.0642959	0.0478158	0.0340814
0.0259733	0.0383034	0.048183	0.0282951
0.0228364	0.0256457	0.0414019	0.0443813
0.0331621	0.0301099	0.0441211	0.067373
0.0491856	0.0373516	0.0472611	0.0209246
0.0187764	0.0181479	0.0373093	0.0129425
0.0145528	0.0302168	0.0310469	0.0163269
0.0419677	0.0608537	0.0181002	0.0185176
0.0471768	0.0525456	0.0313297	0.0256483
0.0622313	0.0404893	0.0312335	0.0731583
0.0258431	0.0741484	0.0481843	0.0404443
0.0443203	0.034547	0.026431	0.0310689
0.0254194	0.0199616	0.021198	0.0466502
0.028208	0.0261337	0.0322792	0.0344786
0.048574	0.0324036	0.029433	0.0296663
0.0182426	0.0450406	0.0437956	0.0410803
0.0460665	0.0227151	0.0143642	0.0535817
0.0196102	0.0178436	0.0280813	0.0306698
0.0357911	0.0469718	0.0245027	0.042165
0.0576253	0.053214	0.0270995	0.0460736
0.0235165	0.0526312	0.0337006	0.0420559
0.0392667	0.0354994	0.0266575	0.0278136
0.0419544	0.0416714	0.0344361
0.0201546	0.0569553	0.0167469
0.0519848	0.0356263	0.0172399
0.0275027	0.0632988
0.0304898	0.0174099
0.0136561	0.0293091
0.028433	0.0420711
0.0400409	0.0303083
0.0306568	0.0307514
0.0340072	0.0373193
0.0394158
0.0188813
0.0291655
0.0293565
0.0153387
0.0149855
