# Supplementary material for: Confined migration promotes cancer metastasis through resistance to anoikis and increased invasiveness
Source: eLife journal article supplement (doi:10.7554/elife.73150), 2022-02-18
Supplement: data2 [file Figure 3 figure supplement 1 J.xlsx]

## Sheet: Sheet1
Lamin A GFP	Ctl
39.7574	60.2426
47.2505	52.7495
43.6156	56.3844
38.537	61.463
