# Supplementary material for: Confined migration promotes cancer metastasis through resistance to anoikis and increased invasiveness
Source: eLife journal article supplement (doi:10.7554/elife.73150), 2022-02-18
Supplement: data2 [file Figure 3 H.xlsx]

## Sheet: Sheet1
Time (h)	Ctl		CM
	Mean	SEM	Mean	SEM
0	0.688732	0.108644	1.22936	0.239153
1	5.76203	0.714966	7.02172	0.524953
2	10.5661	1.41081	12.3419	0.920297
3	16.2877	2.18757	18.708	1.22316
4	22.1884	2.71463	25.5071	1.61074
5	27.6045	3.43975	32.4412	1.87294
6	33.2558	4.18466	39.1396	2.32641
7	37.4537	4.7133	44.7332	2.54063
8	42.0343	5.07771	49.5202	3.10978
9	46.2014	5.33721	55.0207	3.27235
10	50.9486	6.33541	59.1335	3.47016
11	55.1683	6.55952	63.5392	3.79032
12	58.9925	6.76314	68.0681	3.87858
13	61.1869	6.65743	72.3655	4.19473
14	64.0937	6.72579	75.5472	4.31957
15	67.1943	6.57027	78.5608	3.97005
16	70.581	6.1208	80.5122	4.28229
17	72.2257	6.0451	83.0282	3.91154
18	74.826	5.64647	85.0364	3.82354
19	76.8638	5.11609	85.8243	3.25856
20	78.4318	4.90173	87.4408	2.99191
21	79.0759	4.78097	88.3007	2.58071
22	82.3224	4.34177	89.5034	2.31087
23	83.4173	4.32488	90.0937	2.01032
24	84.6724	3.93186	90.8093	2.14238
25	85.4195	3.77496	91.7307	1.83191
26	86.6315	3.53257	92.6938	1.75468
27	88.5174	3.14105	93.4358	1.59707
28	90.0054	2.76727	94.5647	1.22776
29	90.7717	2.5184	94.8765	1.15028
30	91.3337	2.38111	95.1821	0.992338
31	92.0451	2.19709	95.5913	1.04726
32	92.8258	2.07023	96.2867	0.797934
33	93.3159	1.98859	96.8305	0.640668
34	93.8761	1.71426	96.9022	0.630639
35	94.2729	1.66102	97.3293	0.597717
36	94.9095	1.30982	97.4511	0.529731
37	95.2118	1.41341	98.0785	0.494366
38	95.4933	1.35317	98.1014	0.306727
39	95.9486	1.1817	98.1349	0.248844
40	96.3251	1.05207	98.4078	0.190295
41	96.2942	0.99091	98.188	0.323889
42	96.2517	0.958347	98.1361	0.283156
43	96.4076	0.926501	98.1518	0.330532
44	96.6607	0.956192	98.1695	0.313775
45	96.5328	0.797971	98.3095	0.266195
46	96.7299	0.679969	98.4486	0.254736
47	96.7625	0.715254	98.466	0.243777
48	96.7746	0.732901	98.055	0.230955
