# Supplementary material for: Confined migration promotes cancer metastasis through resistance to anoikis and increased invasiveness
Source: eLife journal article supplement (doi:10.7554/elife.73150), 2022-02-18
Supplement: data2 [file Figure 3 K.xlsx]

## Sheet: Sheet1
Time (h)	Ctl		CM
	Mean	SEM	Mean	SEM
0	0.522373	0.141186	0.28147	0.0407727
1	2.05703	0.510803	1.46759	0.170124
2	3.13976	0.732932	2.35604	0.280317
3	3.98343	0.920803	3.36322	0.446223
4	4.9943	1.04983	4.61872	0.574059
5	6.40888	1.39891	5.90687	0.763513
6	7.42769	1.6338	6.82698	0.780354
7	8.41766	1.72583	8.02269	0.779816
8	9.85416	2.10817	8.91471	0.897983
9	10.3567	1.91919	9.70147	0.844819
10	11.4231	2.30966	10.6768	0.860339
11	12.6331	2.42149	11.6273	1.0239
12	13.6393	2.49234	12.5175	0.900728
13	14.5248	2.41541	13.4558	1.01807
14	15.367	2.40933	14.7166	0.914216
15	16.2757	2.76205	15.7375	1.01101
16	17.3645	2.81616	16.6904	1.14963
17	18.2216	2.94597	17.7659	1.21448
18	19.3696	3.01024	18.6939	1.44083
19	20.0822	3.21791	19.3742	1.20906
20	20.9785	2.99396	20.2038	1.28711
21	22.0484	3.24091	20.7483	1.38261
22	22.8697	3.23182	21.7229	1.43486
23	23.3393	3.07055	22.0555	1.27942
24	25.0247	3.29964	23.1256	1.38966
25	25.9152	2.93086	23.2834	1.36224
26	25.5977	3.23247	23.8979	1.2524
27	27.2803	3.23562	24.921	1.46216
28	28.3494	2.94488	26.2355	1.4913
29	29.7603	3.49206	27.0002	1.45049
30	30.7736	3.60988	27.2176	1.41776
31	31.7191	3.62417	28.3657	1.45499
32	32.4369	3.91215	30.0444	1.62999
33	33.9299	4.08765	31.1073	1.63773
34	35.2526	4.17491	31.5136	1.70648
35	35.9386	4.2428	32.6022	1.75094
36	37.1596	4.48679	33.9751	1.81713
37	38.1076	4.50187	34.6003	1.83055
38	39.4405	4.74969	35.7787	1.65883
39	41.2035	4.91614	36.264	1.85145
40	41.6414	5.29382	37.0985	1.5319
41	41.7969	4.76387	38.1951	1.59578
42	42.9302	5.14455	39.4536	1.96931
43	43.8453	5.34667	39.7086	1.98701
44	44.5652	5.03344	40.6943	1.73828
45	44.9082	5.27703	41.4125	1.59377
46	45.1424	5.3105	41.6849	1.84668
47	45.5702	5.67939	42.1752	2.25112
48	47.5484	5.6643	44.296	2.13637
