# Supplementary material for: Confined migration promotes cancer metastasis through resistance to anoikis and increased invasiveness
Source: eLife journal article supplement (doi:10.7554/elife.73150), 2022-02-18
Supplement: data2 [file Figure 3 M.xlsx]

## Sheet: Sheet1
Control	clone 1	clone 2	clone 3
250	2150	2200	2350
280	2200	2300	2500
240	1800	2600	2400
460	1880	2000	2450
