# Supplementary material for: Confined migration promotes cancer metastasis through resistance to anoikis and increased invasiveness
Source: eLife journal article supplement (doi:10.7554/elife.73150), 2022-02-18
Supplement: data2 [file Figure 3 N.xlsx]

## Sheet: Sheet1
Time (h)	Control		clone 1		clone 2		clone 3
	Mean	SEM	Mean	SEM	Mean	SEM	Mean	SEM
0	0	0	0	0	0	0	0	0
0.916667	4.38284	0.577656	5.30593	0.951503	3.7101	0.338456	3.60028	0.383947
1.41667	5.03039	0.614611	7.69427	0.866727	5.65179	0.412866	5.35656	0.433935
1.91667	6.09804	0.619499	9.4906	0.89163	7.53844	0.606615	6.93497	0.472577
2.41667	6.58505	0.619635	11.9808	1.16891	9.70936	0.734598	8.33169	0.486892
2.91667	7.96913	0.788664	15.3003	1.02344	12.0536	0.904412	10.128	0.528427
3.41667	8.65521	0.720304	17.8875	1.10728	14.1826	1.2139	11.927	0.585183
3.91667	9.52379	0.740386	20.3861	0.902081	16.3646	1.1471	13.5748	0.732583
4.41667	10.0562	0.915397	22.5797	1.29314	18.1926	1.13806	15.8428	0.861061
4.91667	10.8308	0.805084	24.8104	1.25482	20.2114	1.08452	18.0055	1.06707
5.41667	11.7742	0.869761	27.7538	1.91883	22.2627	1.13975	19.128	1.12816
5.91667	12.6343	0.962407	29.8296	1.54746	24.1354	1.41116	20.6799	1.25068
6.41667	13.4358	1.115	31.2576	1.30189	25.7505	1.24173	21.9124	1.19745
6.91667	13.6844	1.05369	33.3748	1.79869	27.3893	1.37517	23.9318	1.23915
7.41667	14.5268	0.970996	36.4945	1.67988	29.0404	1.1703	24.9774	1.3852
7.91667	15.3767	0.949465	37.6965	1.67007	30.0884	1.25313	26.508	1.14326
8.41667	16.5793	0.989729	38.9121	2.117	31.8017	1.70447	27.9027	1.3337
8.91667	17.4091	1.06128	41.5229	1.75509	33.4114	1.36974	28.9263	1.13394
9.41667	17.8508	1.08171	42.8915	1.6722	35.137	1.45634	30.3026	1.40408
9.91667	18.5746	0.923096	44.4081	2.01212	36.2891	1.62279	31.8966	1.5215
10.4167	19.1415	1.01103	46.2799	1.58083	37.6893	1.64536	33.0031	1.70698
10.9167	19.7575	1.03224	47.8389	1.53707	39.0746	1.57686	34.2327	1.73356
11.4167	20.2353	1.03042	49.0847	1.40441	40.6412	1.49834	35.1124	1.74101
11.9167	20.7211	1.00985	50.1334	1.49044	41.5191	1.37478	36.4903	1.74993
12.4167	21.5646	1.02468	50.7537	1.59373	42.4597	1.56544	38.1399	1.9301
12.9167	22.2773	1.19961	52.7426	1.63035	44.8281	1.57303	39.4341	1.94074
13.4167	22.4039	1.33127	53.4765	1.64416	45.3862	1.58354	40.2739	1.83586
13.9167	23.6365	1.22332	54.8991	1.65845	46.3481	1.56138	41.3439	2.03747
14.4167	24.0094	1.38334	56.3647	1.73183	47.7573	1.79759	42.8321	2.01125
14.9167	24.5041	1.28231	57.6822	1.8611	48.9747	1.9147	43.522	2.24787
15.4167	25.579	1.48675	57.9483	1.72137	50.6189	2.23565	45.0489	2.19399
15.9167	25.6173	1.54408	58.4809	1.35068	51.6551	2.13741	45.5793	2.1919
16.4167	26.4369	1.60149	59.3793	1.67488	52.947	2.15274	46.7652	2.07962
16.9167	26.7252	1.53791	60.08	1.52386	53.465	2.3321	47.6787	2.15498
17.4167	27.3616	1.64627	60.7754	1.93895	54.7158	2.11528	48.3641	2.12227
17.9167	27.6986	1.53421	62.571	1.62683	55.4033	2.03522	49.299	2.22945
18.4167	28.174	1.71918	62.8431	1.70516	56.5804	2.16065	49.7042	2.06198
18.9167	28.6443	1.5911	63.3617	1.39352	57.2725	2.1328	50.5303	1.99733
19.4167	28.9522	1.48074	64.0904	1.73714	58.2525	2.10735	51.324	2.25316
19.9167	29.4722	1.71836	64.9841	1.78014	59.0796	2.05688	52.1919	2.3246
20.4167	29.9625	1.66426	65.3775	1.98633	59.4418	1.93962	53.2366	2.49043
20.9167	30.2591	1.55086	65.7455	1.87005	60.2648	2.0906	54.0521	2.50068
21.4167	30.8329	1.79987	66.4684	1.88525	61.2751	2.35676	54.4804	2.35342
21.9167	31.2465	1.68112	66.958	1.79895	61.8296	2.44367	55.4063	2.48237
22.4167	31.668	1.63932	67.373	1.61192	62.3542	2.44324	55.9362	2.49223
22.9167	31.809	1.78051	67.9612	2.02305	63.1656	2.54223	56.9317	2.43974
23.4167	32.0022	1.69438	68.9136	1.97496	63.4506	2.53635	57.5787	2.40322
23.9167	31.8913	1.65932	68.4275	1.82879	63.9651	2.26526	58.8212	2.63815
24.4167	32.3849	1.64926	69.9641	1.79838	64.6636	2.25585	58.9022	2.44572
