# Supplementary material for: Confined migration promotes cancer metastasis through resistance to anoikis and increased invasiveness
Source: eLife journal article supplement (doi:10.7554/elife.73150), 2022-02-18
Supplement: data2 [file Figure 3 O.xlsx]

## Sheet: Sheet1
Ctl	CM
1.4314	1.16306
1.47713	1.19052
1.39939	1.18053
