# Supplementary material for: Confined migration promotes cancer metastasis through resistance to anoikis and increased invasiveness
Source: eLife journal article supplement (doi:10.7554/elife.73150), 2022-02-18
Supplement: data2 [file Figure 4 A.xlsx]

## Sheet: Sheet1
Time (weeks)	Ctl	CM		6 weeks post-graft :
0	0	0
6	20	73.3		Ctl : 3 (20%) mets / 12 (80%) no mets
8	66.6	86.6		CM : 11 (73.3%) mets / 4 (26.6%) no mets
				Exact Chi ^2 test
				Fisher exact test statistical value : 0.0092
				8 weeks post-graft
				Ctl : 8 (66.6%) mets / 4 (33.4%) no mets
				CM : 13 (86.6%) mets / 2 (13.4%) no mets
				Fisher exact test statistical value : 0.3575
