# Supplementary material for: Confined migration promotes cancer metastasis through resistance to anoikis and increased invasiveness
Source: eLife journal article supplement (doi:10.7554/elife.73150), 2022-02-18
Supplement: data2 [file Figure 4 C.xlsx]

## Sheet: Sheet1
Ctl		CM
week 6	week 8	week 6	week 8
452.89	510.46	592.89	536
682.43	517.97	485.05	536.28
470.02	483.95	558.22	480.96
453.77	394.22	552.3	543.11
435.95	548.74	576.73	461.11
488.56	533.67	526.26	496.09
513.91	539.65	539	491.36
502.2	512.59	498.21	498.32
536.64	521.5	528.73	536.56
522.14	358.74	526.11	506.27
544.88	517.37	532.48	558.45
440.98	480.15	536.56	523.95
		603.19	586.17
		556.91	421.03
		525.59	423.98
