# Supplementary material for: Confined migration promotes cancer metastasis through resistance to anoikis and increased invasiveness
Source: eLife journal article supplement (doi:10.7554/elife.73150), 2022-02-18
Supplement: data2 [file Figure 4 E.xlsx]

## Sheet: Sheet1
Ctl	CM
3.48152	4.18879
0.0707251	14.1971
5.53511	1.00072
4.2881	2.82715
0.347316	3.04892
3.13389	6.27274
0.41418	15.5861
1.67299	3.68337
2.66969	1.78213
0.266943	1.48253
0.0367808	3.08339
0.199355	7.05551
