# Supplementary material for: Confined migration promotes cancer metastasis through resistance to anoikis and increased invasiveness
Source: eLife journal article supplement (doi:10.7554/elife.73150), 2022-02-18
Supplement: data2 [file Figure 4 figure supplement 1 A.xlsx]

## Sheet: Sheet1
Ctl	CM
525.8	94.43
411.34	305.68
474.73	385.79
488.43	146.3
	393.28
